# Supplementary material for: Change in Emergency Department Providers’ Beliefs and Practices After Use of New Protocols for Suicidal Patients
Source: Atypon-hosted journal article supplement (doi:10.1176/appi.ps.201400244), 2015-03-02
Supplement: appi.ps.201400244.ds001.pdf [file appi.ps.201400244.ds001.pdf]

**Figure 1.** Providers reporting they “agree” or “strongly agree” that they are confident they have the skills for care of suicidal ED patients, by provider type and study phase.

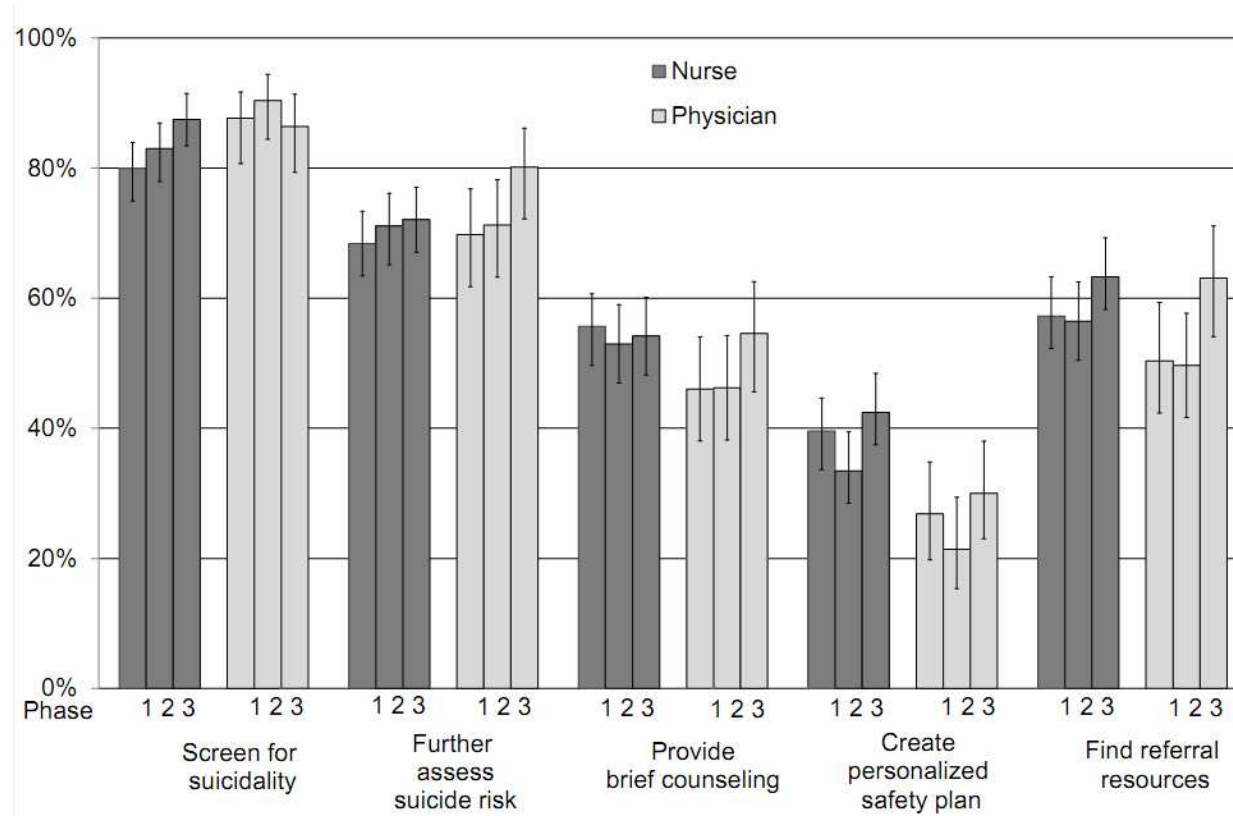

**Figure 1 Legend.** Bars represent 95% Confidence Intervals.

**Figure 2.** Providers' attitudes concerning care of suicidal ED patients, by provider type and study phase.

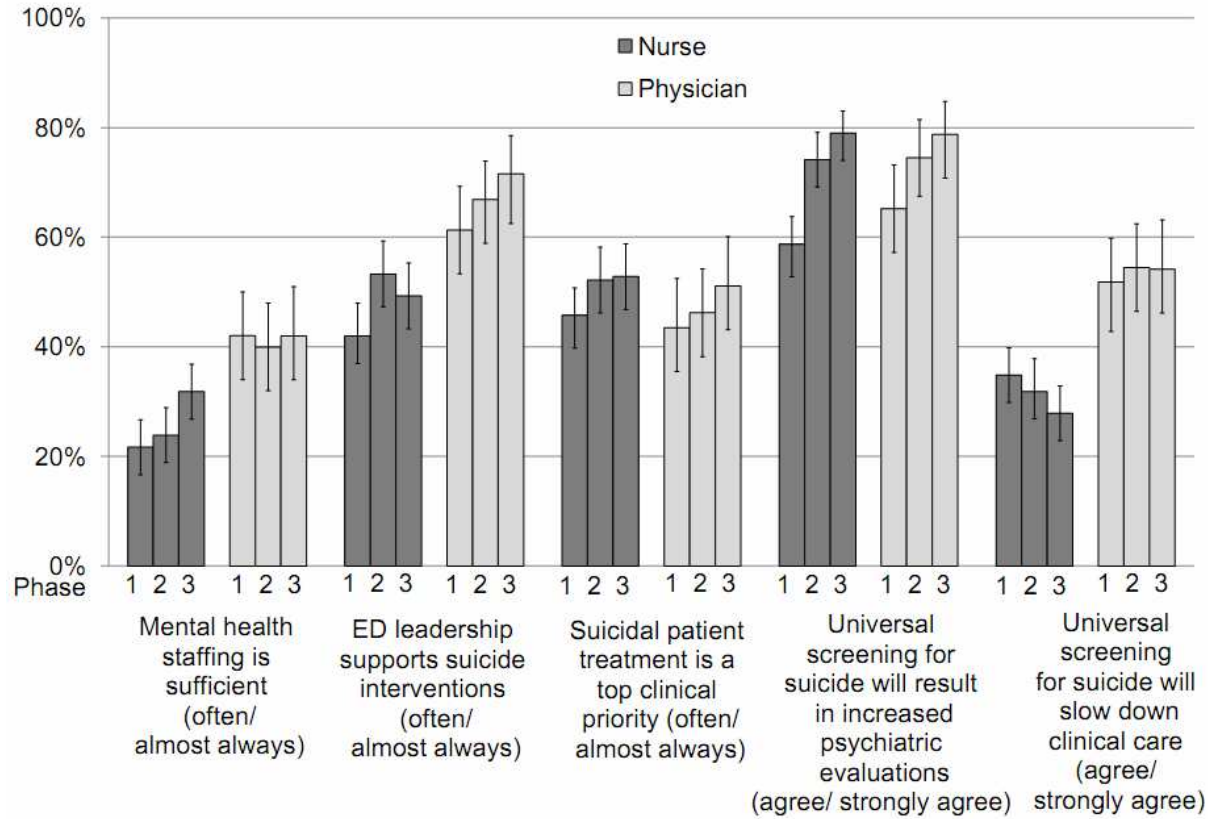

**Figure 2 Legend.** Bars represent 95% Confidence Intervals.

**Figure 3.** Proportion of providers who report “often” or “almost always” providing additional assessment or care to most or all suicidal patients, by provider type and study phase.

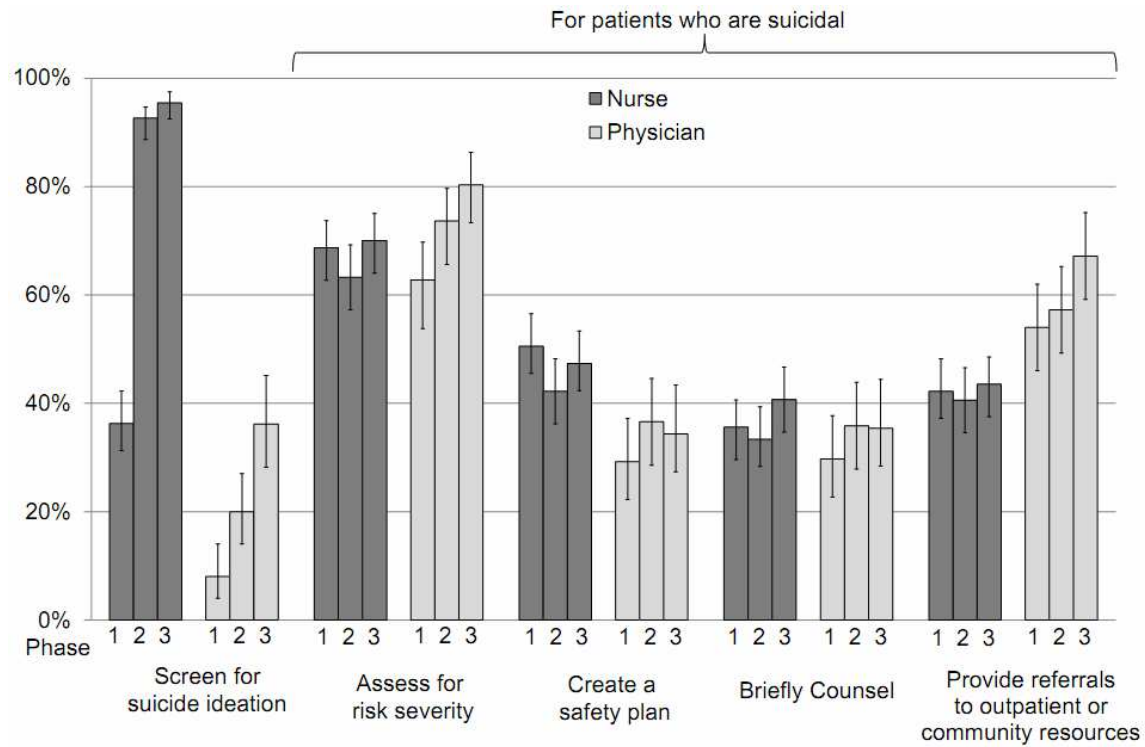

**Figure 3 Legend.** Bars represent 95% Confidence Intervals.

**Figure 4.** Providers reporting “often” or “almost always” asking suicidal patients if there are firearms at home for various patient scenarios, by provider type and study phase.

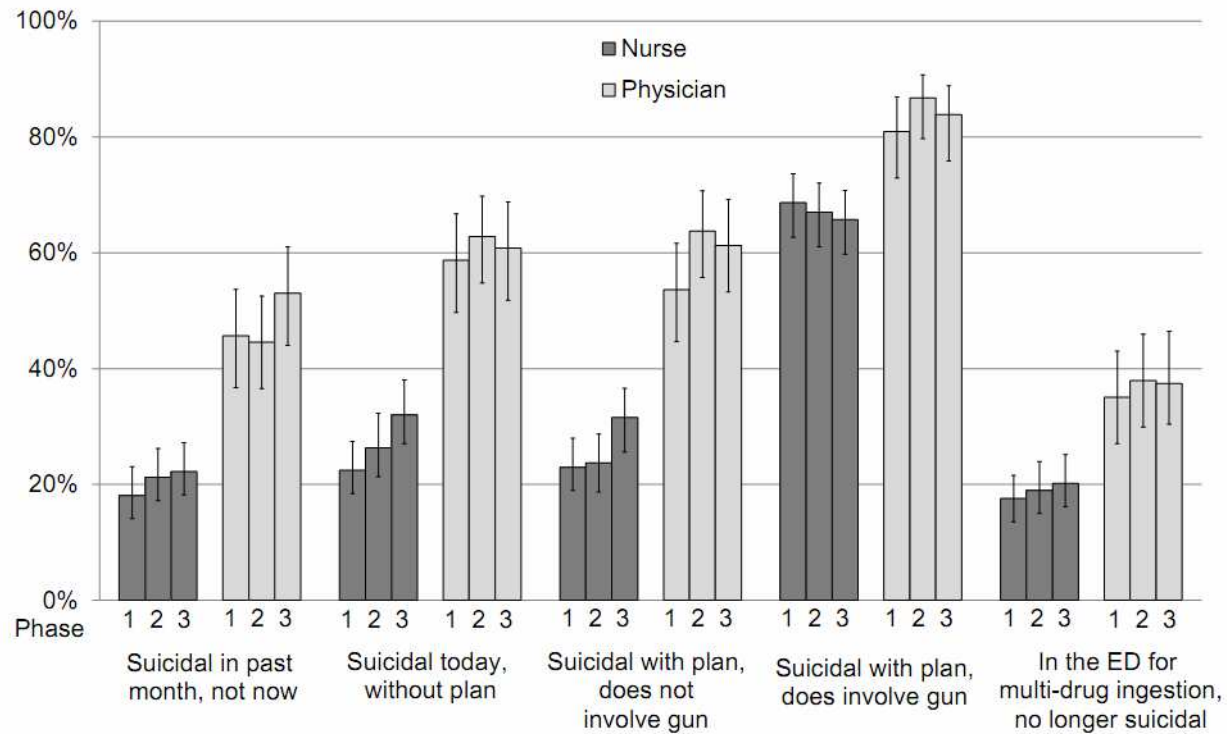

**Figure 4 Legend.** Bars represent 95% Confidence Intervals.
